# Supplementary material for: Skn-1a/Pou2f3 is required for the generation of Trpm5-expressing microvillous cells in the mouse main olfactory epithelium
Source: PubMed Central journal article supplement (PMC3901341; doi:10.1186/1471-2202-15-13), 2014-01-16
Supplement: 1471-2202-15-13-S1.pdf [file 1471-2202-15-13-S1.pdf]

**Supplemental Table S1**Summary of the quantification analyses of *Skn-1a*-, *Trpm5*-, and *Mash1*-expressing cells in the MOE.

| Mouse ID        |                        | S384  | S656  | S660  | Average | SD    |
|-----------------|------------------------|-------|-------|-------|---------|-------|
| Number of cells | Skn1a+ cells           | 787   | 199   | 214   | 400     | 335   |
|                 | Trpm5+ cells           | 1395  | 731   | 378   | 835     | 516   |
|                 | Skn1a+Trpm5+ cells     | 603   | 144   | 180   | 309     | 255   |
| Population (%)  | Skn1a+Trpm5+ / Skn1a+  | 76.6% | 72.4% | 84.1% | 77.7%   | 5.9%  |
|                 | Skn1a+ Trpm5+ / Trpm5+ | 43.2% | 19.7% | 47.6% | 36.8%   | 15.0% |

| Mouse ID        |                        | S384 | S656  | S660 | Average | SD    |
|-----------------|------------------------|------|-------|------|---------|-------|
| Number of cells | Skn1a+ cells           | 566  | 290   | 272  | 376     | 164.8 |
|                 | Mash1+ cells           | 2963 | 2493  | 1269 | 2242    | 874.5 |
|                 | Skn1a+ Mash1+ cells    | 29   | 30    | 26   | 28      | 2.1   |
| Population (%)  | Skn1a+ Mash1+ / Skn1a+ | 5.1% | 10.3% | 9.6% | 8.3%    | 2.8%  |
|                 | Skn1a+ Mash1+ / Mash1+ | 1.0% | 1.2%  | 2.0% | 1.4%    | 0.56% |
