# Supplementary material for: Skn-1a/Pou2f3 is required for the generation of Trpm5-expressing microvillous cells in the mouse main olfactory epithelium
Source: PubMed Central journal article supplement (PMC3901341; doi:10.1186/1471-2202-15-13), 2014-01-16
Supplement: 1471-2202-15-13-S2.pdf [file 1471-2202-15-13-S2.pdf]

Additional file 2

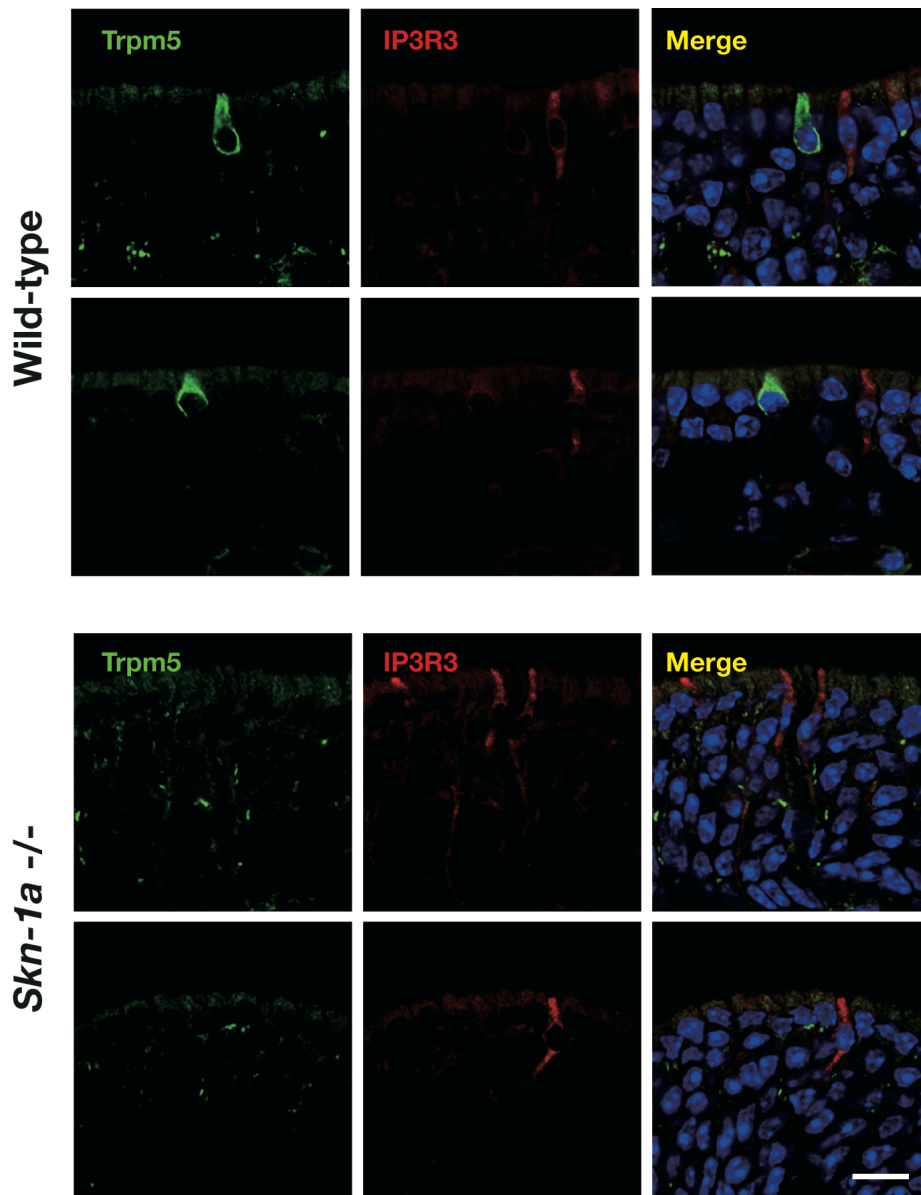

**Supplemental Figure S1. IP<sub>3</sub>R3 -positive microvillous cells remained in the *Skn-1a*<sup>-/-</sup> MOE.**

Coronal sections of the wild-type and *Skn-1a*<sup>-/-</sup> MOE of adult mice were immunostained with an anti-Trpm5 antibody (green) and an anti-IP<sub>3</sub>R3 (red). Trpm5-positive cells did not overlap with IP<sub>3</sub>R3-positive cells in the wild-type MOE. In the *Skn-1a*<sup>-/-</sup> MOE, IP<sub>3</sub>R3-positive cells were observed, whereas no immunoreactive signal for Trpm5 was detected, indicating that IP<sub>3</sub>R3-positive microvillous cells are distinct from Trpm5-microvillous cells and *Skn-1a* is not a critical factor to generate IP<sub>3</sub>R3-microvillous cells in the MOE. Scale bars, 10  $\mu$ m.
